# Supplementary material
Source: PubMed Central journal article supplement (PMC516553)

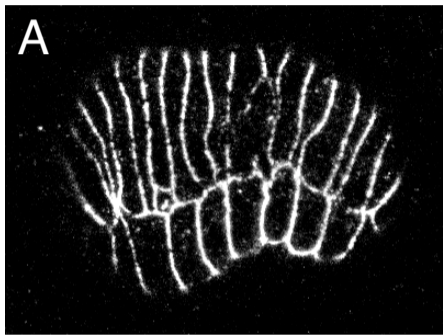

Wild-type

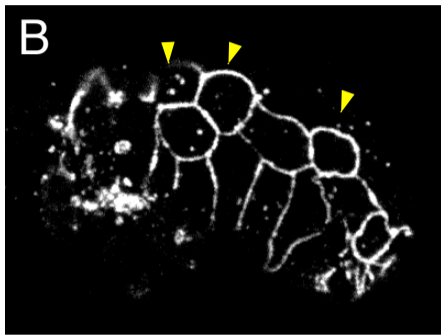

*paf-2*

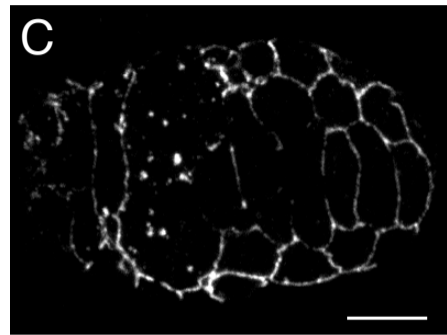

*paf-2*

Supplement: pnas_101_36_13233__3.pdf [file pnas_101_36_13233__3.pdf]
